# Supplementary material for: Amblyopic binocular imbalance quantified by the dichoptic contrast ordering test and dichoptic letters test
Source: PubMed Central journal article supplement — Sci Rep. 2025 Jan 2;15:361. doi: 10.1038/s41598-024-82899-2 (PMC11696884; doi:10.1038/s41598-024-82899-2), 2025-01-02
Supplement: 41598_2024_82899_MOESM1_ESM.pdf [file 41598_2024_82899_MOESM1_ESM.pdf]

# 1 Supplementary Material

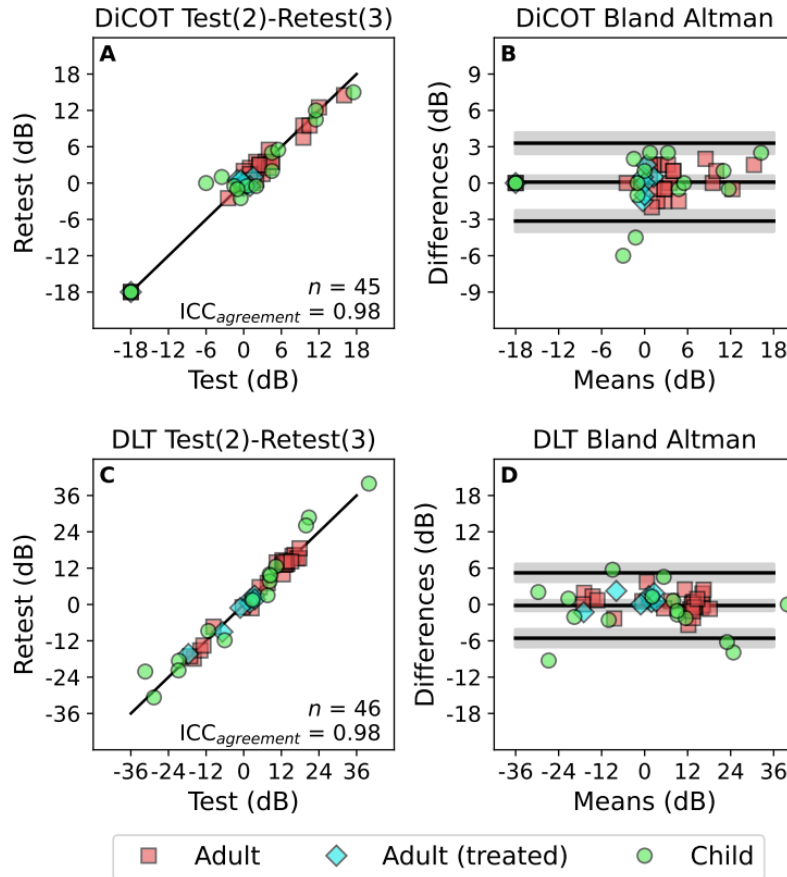

2

3 **Figure S1. Test-retest reliability comparison of second and third measurements made with the**  
4 **DiCOT (top row) and DLT (bottom row). The panels on the left show scatter plots of retest vs test**  
5 **measurement. The solid diagonal line is the line of equality ( $y = x$ ). The panels on the right show**  
6 **Bland Altman plots of the difference against the mean. The three solid lines show the bias, and the**  
7 **limits of agreement. Shaded regions around those lines give the 95% confidence intervals. Positive**  
8 **and negative values refer to suppression on right and left eyes respectively.**

9

**DLT result compared to DiCOT (original and adjusted)**

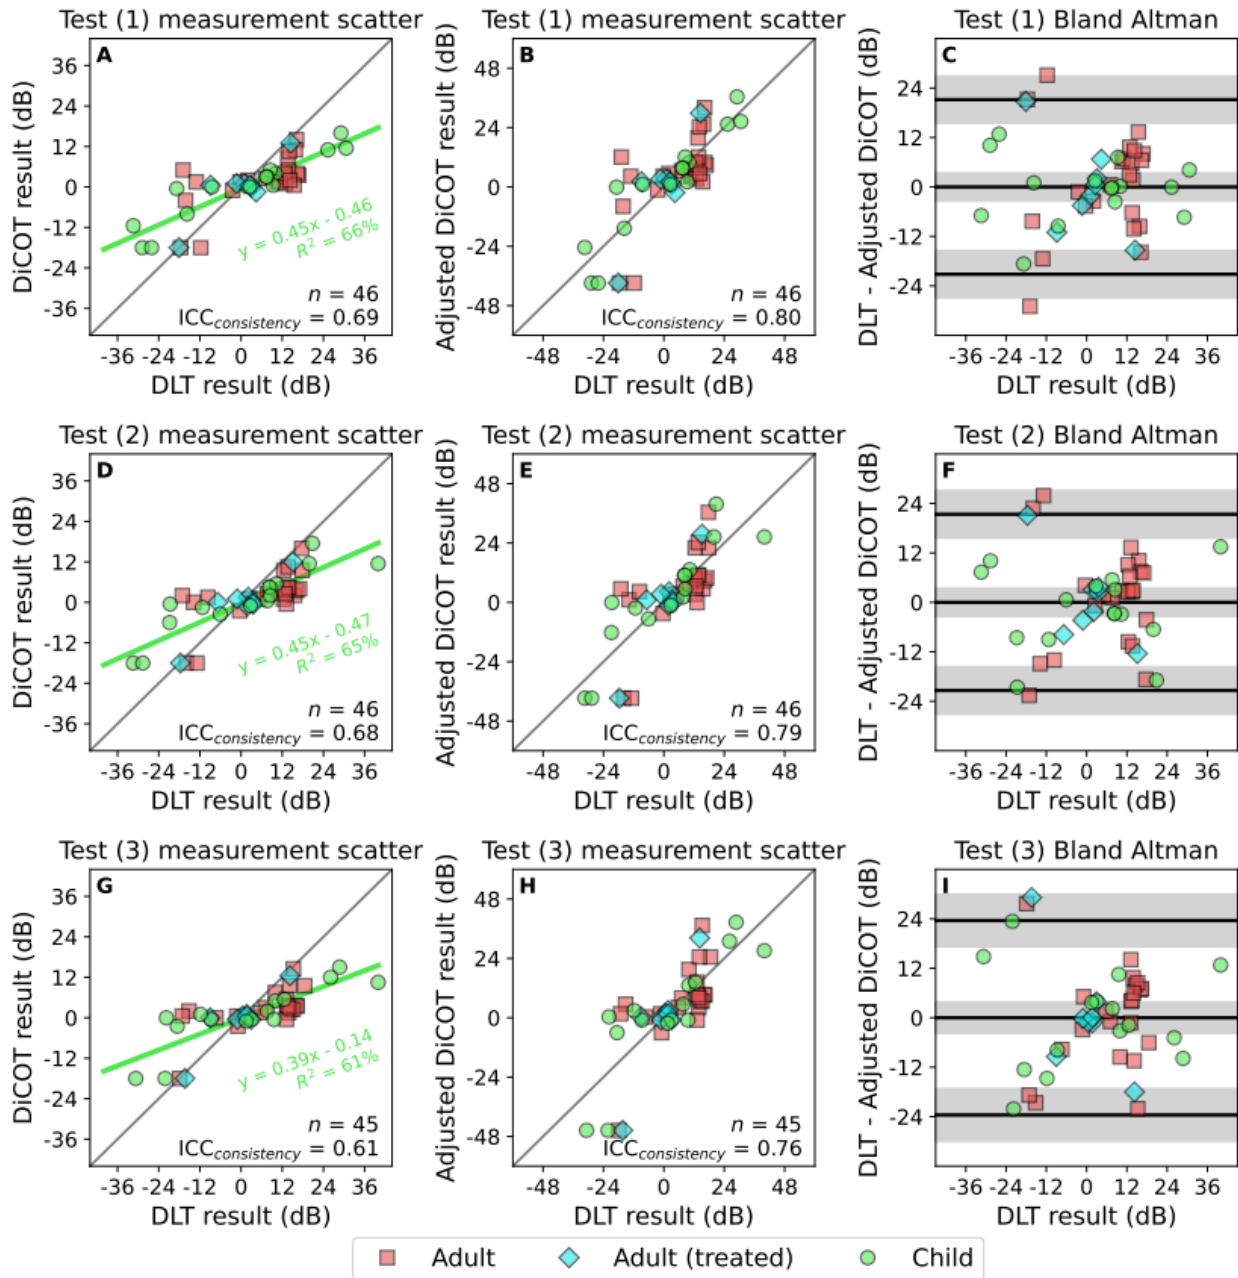

10

11 **Figure S2. Comparisons between DLT and DiCOT measurements. Presentation is similar to that in**  
 12 **Figure S1. The left column shows scatter plots with the  $ICC_{consistency}$  calculated as well as the linear**  
 13 **regression (in green) between the two measures. This regression is used to transform the DiCOT**  
 14 **results to give the adjusted DiCOT in the middle column that is put into better agreement with the**  
 15 **DLT. The right column shows the Bland Altman plot of the difference between the two measures**  
 16 **plotted against the DLT result.**

17

18

19

20

21

22

23

24

25

26

27

28

29

30

31

32

33

34

35 **Supplementary Data Table 1: Complete dataset of the participants. Balance point estimated with the**  
36 **DiCOT are expressed in DB. For the DLT, the estimated monocular thresholds are reported. Three**  
37 **repetitions for each measurement. \*Clinical stereo tests: Randot for adults and Titmus for children.**  
38 **NA for No available. NM for No measurable. BF for Bad fit**

| Participant ID                  | Age (yrs) | Sex    | Type of Amblyopia      | Amblyopic eye (1=R, 2=L) | VA Amblyopic eye (logMAR) | Clinical stereo tests* #test | DICOT (dB)                                                           | DLT OS | DLT OD | McGill stereo test (arcsec) |
|---------------------------------|-----------|--------|------------------------|--------------------------|---------------------------|------------------------------|----------------------------------------------------------------------|--------|--------|-----------------------------|
| <b>AMBLYOPIC ADULTS</b>         |           |        |                        |                          |                           |                              |                                                                      |        |        |                             |
| 1                               | 65        | Male   | Strabismus 2deg eso    | 2                        | 0.4                       | NM                           | 1 3.5 0.9000 0.1300<br>2 2 0.9000 0.1500<br>3 3 0.8800 0.1450        |        |        | 231<br>85<br>75             |
| 2                               | 31        | Female | Strabismus 10deg eso   | 2                        | 0.6                       | 200                          | 1 1.5 0.8279 0.2470<br>2 2 0.8309 0.2479<br>3 1.5 0.8760 0.1770      |        |        | 281<br>129<br>317           |
| 3                               | 22        | Male   | Strabismus 2deg eso    | 2                        | 1.0                       | NM                           | 1 1.5 0.8917 0.2471<br>2 2 0.8565 0.2065<br>3 2.5 0.8476 0.1577      |        |        | 1<br>10625<br>31378         |
| 4                               | 28        | Male   | Mixed 3deg eso         | 2                        | 0.6                       | 200                          | 1 3 0.8859 0.1876<br>2 3 0.8818 0.1368<br>3 3.5 0.8888 0.1353        |        |        | 940<br>914<br>953           |
| 5                               | 58        | Male   | Mixed 3deg eso         | 2                        | 0.3                       | 50                           | 1 2.5 0.7465 0.3305<br>2 2.5 0.7878 0.3262<br>3 3 0.8063 0.3558      |        |        | 90<br>117<br>95             |
| 6                               | 35        | Male   | mixed 15deg eso        | 2                        | 0.4<br>-0.1               | 70                           | 1 4 0.8888 0.1353<br>2 4 0.9062 0.1276<br>3 2.5 0.9061 0.1570        |        |        | 64<br>94<br>70              |
| 7                               | 68        | Female | Mixed < 5deg eso       | 1                        | 1.3                       | NM                           | 1 -18 0.1177 0.8958<br>2 -18 0.1479 0.9259<br>3 -18 0.1182 0.9247    |        |        | 32768<br>32768<br>32768     |
| 9                               | 30        | Female | Strabismus 15deg eso   | 1                        | 0.7                       | NM                           | 1 -4 0.1368 0.8811<br>2 0 0.1796 0.8837<br>3 2 0.1572 0.9021         |        |        | 23170<br>32768<br>32768     |
| 10                              | 26        | Female | Mixed 3deg eso         | 2                        | 0.3                       | NM                           | 1 8.5 0.9040 0.1890<br>2 9.5 0.8700 0.2074<br>3 7.5 0.8728 0.2769    |        |        | 32768<br>3715<br>6558       |
| 13                              | 26        | Male   | Anisometropia          | 1                        | 0.8<br>-0.1               | NM                           | 1 5 0.1280 0.8950<br>2 2 0.1280 0.9171<br>3 0.5 0.1273 0.9151        |        |        | 389<br>351<br>378           |
| 14                              | 26        | Female | Anisometropia          | 2                        | 0                         | 40                           | 1 2 0.6647 0.5271<br>2 1 0.7086 0.3946<br>3 1.5 0.7270 0.3760        |        |        | 36<br>88<br>50              |
| 15                              | 29        | Female | Strabismus 5deg eso    | 2                        | 0.2                       | NM                           | 1 1.5 0.1923 0.8671<br>2 1.5 0.2816 0.8560<br>3 0 0.3517 0.8208      |        |        | 8F<br>8F<br>8F              |
| 16                              | 63        | Female | Strabismus < 5deg eso  | 2                        | 1.3                       | NM                           | 1 5 0.8679 0.1770<br>2 4.5 0.8380 0.1770<br>3 3.5 0.8635 0.1875      |        |        | 4391<br>32768<br>NA         |
| 17                              | 73        | Female | Mixed < 5deg eso       | 1                        | 0.8                       | NM                           | 1 -18 0.2329 0.9016<br>2 -18 0.1974 0.8668<br>3 0 0.1870 0.8906      |        |        | 32768<br>10566<br>25829     |
| 18                              | 22        | Female | Mixed 5deg eso         | 2                        | 0.5                       | 500                          | 1 0.8463 0.1819<br>2 4 0.8344 0.2011<br>3 5.5 0.8533 0.1875          |        |        | 1461<br>505<br>250          |
| 21                              | 61        | Male   | Anisometropia          | 2                        | 1.0                       | 200                          | 1 4 0.8571 0.1867<br>2 4.5 0.8468 0.1710<br>3 3.5 0.8560 0.1816      |        |        | 346<br>286<br>260           |
| 23                              | 60        | Male   | Strabismus < 5deg eso  | 2                        | 0                         | NM                           | 1 14 0.8898 0.1379<br>2 16 0.9007 0.1176<br>3 14.5 0.9085 0.1570     |        |        | 32768<br>4824<br>32768      |
| 24                              | 21        | Female | Anisometropia          | 2                        | 0.7                       | 50                           | 1 0.5 0.8735 0.1477<br>2 -0.5 0.8591 0.1875<br>3 -0.5 0.8272 0.1810  |        |        | 124<br>126<br>124           |
| 25                              | 34        | Male   | Anisometropia          | 2                        | 0.8                       | NM                           | 1 11 0.9074 0.1469<br>2 9.5 0.9160 0.1177<br>3 9.5 0.9149 0.1078     |        |        | ND<br>ND<br>ND              |
| 26                              | 47        | Male   | Mixed < 5deg eso       | 2                        | 0                         | Fingers                      | 1 10.5 0.8963 0.1770<br>2 10.5 0.8895 0.1842<br>3 9.5 0.9015 0.1769  |        |        | 1<br>30967<br>4694          |
| 28                              | 23        | Male   | Strabismus 3deg eso    | 2                        | 0.3                       | 70                           | 1 1.5 0.5745 0.5934<br>2 1 0.6630 0.4971<br>3 0.5 0.5437 0.6270      |        |        | 453<br>212<br>100           |
| 30                              | 22        | Male   | Strabismus 3deg eso    | 1                        | 0.5                       | 25                           | 1 -1 0.4732 0.6274<br>2 -2.5 0.5289 0.5522<br>3 -2.5 0.5228 0.5810   |        |        | 68<br>76<br>62              |
| 31                              | 18        | Male   | Strabismus 2deg eso    | 2                        | 0.4                       | 70                           | 1 2 0.8619 0.1671<br>2 2.5 0.8249 0.1875<br>3 3 0.8655 0.1727        |        |        | 62<br>173<br>149            |
| 22                              | 51        | Female | Strabismus surgery     | 2                        | 0.1                       | NM                           | 1 13 0.8831 0.1670<br>2 12 0.9023 0.1578<br>3 12.5 0.8619 0.1671     |        |        | 32768<br>32768<br>32768     |
| <b>TREATED AMBLYOPIC ADULTS</b> |           |        |                        |                          |                           |                              |                                                                      |        |        |                             |
| 8                               | 35        | Male   | Treated                | 2                        | 0.1                       | 40                           | 1 1 0.6242 0.5571<br>2 1.5 0.6668 0.5190<br>3 1 0.6303 0.5177        |        |        | 56<br>50<br>163             |
| 11                              | 32        | Female | Treated 2deg eso       | 1                        | 0.1                       | NM                           | 1 -18 0.1115 0.8966<br>2 -18 0.1177 0.8963<br>3 -18 0.1380 0.9074    |        |        | 4987<br>4545<br>32768       |
| 12                              | 33        | Male   | Treated                | 1                        | 0                         | 20                           | 1 0 0.6473 0.4569<br>2 -1 0.6671 0.5376<br>3 0.5 0.6857 0.6485       |        |        | 53<br>42<br>34              |
| 19                              | 21        | Female | Treated                | 2                        | 0                         | 50                           | 1 -1.5 0.7252 0.4369<br>2 0 0.7205 0.4846<br>3 -0.5 0.6729 0.4797    |        |        | 221<br>261<br>248           |
| 20                              | 33        | Male   | Treated Mixed 2deg eso | 1                        | 0.1                       | 25                           | 1 1 0.5796 0.6725<br>2 1 0.6127 0.6952<br>3 -0.5 0.5407 0.6135       |        |        | 69<br>74<br>63              |
| 27                              | 25        | Male   | Treated 5deg eso       | 1                        | 0.2                       | NM                           | 1 0.5 0.3020 0.8393<br>2 0 0.3681 0.8056<br>3 0 0.2950 0.8354        |        |        | 32768<br>32768<br>4987      |
| 29                              | 31        | Female | Treated 1deg eso       | 2                        | 0.2                       | 25                           | 1 0.5 0.6352 0.4706<br>2 -0.5 0.7070 0.4683<br>3 0.5 0.6164 0.5079   |        |        | 87<br>66<br>64              |
| <b>AMBLYOPIC CHILDREN</b>       |           |        |                        |                          |                           |                              |                                                                      |        |        |                             |
| 1                               | 14        | Female | Anisometropia          | 2                        | 0.9                       | 200                          | 1 4 0.7675 0.2413<br>2 4.5 0.7870 0.3033<br>3 5 0.8038 0.2558        |        |        | 427<br>309<br>475           |
| 2                               | 8         | Male   | Anisometropia          | 1                        | 0.4                       | 40                           | 1 0 0.2916 0.7751<br>2 -1.5 0.2266 0.8316<br>3 -0.5 0.3011 0.8227    |        |        | 227<br>2<br>0               |
| 3                               | 9         | Male   | Anisometropia          | 1                        | 0.5                       | NM                           | 1 -8 0.1577 0.9643<br>2 -3.5 0.4866 0.8785<br>3 1 0.2484 0.9679      |        |        | 13336<br>32768<br>NM        |
| 4                               | 8         | Male   | Strabismus 11deg eso   | 2                        | 0.6                       | 400                          | 1 5 0.9170 0.3454<br>2 5.5 0.9067 0.2759<br>3 5.5 0.9739 0.2286      |        |        | 32768<br>5792<br>32768      |
| 5                               | 9         | Female | Mixed 11deg eso        | 1                        | 0.3                       | 40                           | 1 -0.5 0.1078 0.9362<br>2 -0.5 0.0884 0.9536<br>3 -2.5 0.1194 0.9396 |        |        | 124<br>148<br>101           |
| 6                               | 10        | Male   | Anisometropia          | 2                        | 0.3                       | NM                           | 1 16 0.9747 0.0342<br>2 17.5 0.9704 0.0884<br>3 15 0.9760 0.0957     |        |        | 32768<br>32768<br>4824      |
| 7                               | 10        | Male   | Strabismus 11deg eso   | 2                        | 0.5                       | 200                          | 1 11 0.9775 0.0530<br>2 11.5 0.9926 0.0100<br>3 10.5 0.9926 0.0100   |        |        | 4987<br>32768<br>10022      |
| 8                               | 12        | Female | Anisometropia          | 2                        | 0.5                       | 200                          | 1 0.5 0.7827 0.2672<br>2 0.5 0.8471 0.3527<br>3 -0.5 0.7674 0.5397   |        |        | 134<br>138<br>129           |
| 9                               | 9         | Female | Anisometropia          | 2                        | 0.6                       | NA                           | 1 3 0.8290 0.3470<br>2 4.5 0.8125 0.3134<br>3 2 0.8118 0.3361        |        |        | 10<br>297<br>86             |
| 10                              | 12        | Female | Anisometropia          | 2                        | 0.3                       | NA                           | 1 11.5 0.9774 0.0288<br>2 11.5 0.9674 0.0980<br>3 12 0.9868 0.0489   |        |        | 32768<br>32768<br>32768     |
| 11                              | 8         | Male   | Anisometropia          | 2                        | 0.5                       | NA                           | 1 3 0.8090 0.3470<br>2 2 0.8511 0.3192<br>3 -0.5 0.7752 0.2571       |        |        | 66<br>117<br>89             |
| 12                              | 9         | Female | Anisometropia          | 2                        | 0.7                       | 3000                         | 1 0 0.6858 0.5131<br>2 -1 0.6876 0.5001<br>3 -1 0.7920 0.6668        |        |        | 52<br>64<br>57              |
| 13                              | 15        | Male   | Anisometropia          | 1                        | 0.4                       | NM                           | 1 -18 0.0360 0.9888<br>2 -18 0.0266 0.9894<br>3 -18 0.0770 0.9867    |        |        | 32768<br>32768<br>32768     |
| 14                              | 12        | Female | Anisometropia          | 1                        | 0.4                       | NA                           | 1 -18 0.0480 0.9660<br>2 -18 0.0461 0.9774<br>3 -18 0.0285 0.9774    |        |        | 32768<br>20792<br>4376      |
| 15                              | 10        | Male   | Anisometropia          | 1                        | 0.4                       | NM                           | 1 -11.5 0.0266 0.9894<br>2 -6 0.0805 0.9916<br>3 0 0.0806 0.9879     |        |        | 32768<br>32768<br>32768     |
